# Supplementary material for: Molecular Dissection of the Basal Clades in the Human Y Chromosome Phylogenetic Tree
Source: PLoS One. 2012 Nov 7;7(11):e49170. doi: 10.1371/journal.pone.0049170 (PMC3492319; doi:10.1371/journal.pone.0049170)
Supplement: Table S1 — Haplogroup affiliation for 51 Y chromosomes analyzed in this study. (XLS) [file pone.0049170.s002.xls]

## Sheet: Foglio1
Table S1: Haplogroup affiliation for 51 Y chromosomes analyzed in this study
Sample	Haplogroup				Country
	Formera		New
	by lineage	by mutation	by lineage	by mutation
1	-	-	A1b*	A-V148*	Jamaica
2	-	-	A1b1*	A-V150*	Ghana
3b	A1b*	A-V164*	A1b1a*	A-V151*	Algeria
4b	A1b	A-P114	A1b1a1	A-P114	Cameroon
5	A1a	A-M31	A1a*	A-M31*	Niger
6	A1a	A-M31	A1a1	A-V53	Niger
7	A2a	A-M114	A2a	A-M114	South Africa
8	A2c	A-P262	A2c*	A-P262*	South Africa
9	A2c	A-P262	A2c1	A-V218	South Africa
10	A3a	A-M28	A3a	A-M28	Ethiopia
11	A3b1*	A-M51*	A3b1*	A-M51*	South Africa
12	A3b1*	A-M51*	A3b1b	A-V11	South Africa
13	A3b1*	A-M51*	A3b1c	A-V306	South Africa
14	A3b1a	A-P71	A3b1a	A-P71	South Africa
15	A3b2*	A-M13*	A3b2*	A-M13*	Kenya
16	A3b2*	A-M13*	A3b2c	A-V3	Ethiopia
17	A3b2*	A-M13*	A3b2d	A-V67	Cameroon
18	A3b2*	A-M13*	A3b2e	A-V317	Ethiopia
19	A3b2b	A-M118	A3b2b	A-M118	Kenya
20	B1*	B-M236*	B1*	B-M236*	Cameroon
21	B1a	B-M146	B1a	B-M146	Mali
22	B2a*	B-M150*	B2a*	B-M150*	Mali
23c	B2a*	B-M150*	B2a1*	B-V78*	Democratic Republic of the Congo
24	B2a*	B-M150*	B2a1a*	B-V75*	Cameroon
25	B2a1*	B-M218*	B2a1a2*	B-M218*	Cameroon
26	B2a1*	B-M218*	B2a1a2a*	B-V62*	Cameroon
27	B2a1*	B-M218*	B2a1a2a1	B-V254	Kenya
28	B2a1a	B-M109	B2a1a2a2*	B-M109*	Cameroon
29	B2a1a	B-M109	B2a1a2a2a	B-P50	Cameroon
30	B2a2	B-M108.1	B2a1a1	B-M108.1	Mali
31	B2b	B-M112	B2b1	B-50f2(P)	South Africa
32	B2c	B-P112	B2b2	B-P112	Cameroon
33	DE	DE-YAP	DE	DE-YAP	South Africa
34	C*	C-RPS4Y711*	C7	C-V20	Italy
35c	C1	C-M8	C1	C-M8	Japan
36	C2	C-M38	C2	C-M38	Papua New Guinea
37c	C3	C-M217	C3	C-M217	Pakistan
38	C4	C-M347	C4	C-M347	Australia
39c	C5	C-M356	C5	C-M356	Pakistan
40	F* (xGHIJK)	F-M213*	F* (xGHIJK)	F-M213*	Italy
41	G	G-M201	G	G-M201	Italy
42	H	H-M69	H	H-M69	Pakistan
43	I	I-M170	I	I-M170	Italy
44	J	J-12f2a	J	J-12f2a	Italy
45	L	L-M20	L	L-M20	Italy
46	T	T-M70	T	T-M70	Ethiopia
47	M	M-P256	M	M-P256	Papua New Guinea
48	NO	NO-M214	NO	NO-M214	Denmark
49	Q	Q-M242	Q	Q-M242	Dominican Republic
50	R	R-M207	R1b1a4	R-V69	Cameroon
51	S	S-M230	S	S-M230	Papua New Guinea
a Haplogroup nomenclature according to Karafet et al. (2008) Genome Res 18: 830-838; and Cruciani et al. (2011) Am J Hum Genet 88: 814-818.
b These chromosomes have been previously reported (Cruciani et al. 2011, Am J Hum Genet 88: 814-818).
c Samples from the Human Genome Diversity Project/CEPH DNA panel (Cann et al. 2002, Science 296: 261-262).
